# Supplementary material
Source: PubMed Central journal article supplement (PMC6714464)
Supplement: jama-e1911889-s001.pdf [file jama-e1911889-s001.pdf]

|    |                                        |    |
|----|----------------------------------------|----|
| 14 | Table of Contents                      |    |
| 15 | Trial Protocol.....                    | 1  |
| 16 | Introduction .....                     | 3  |
| 17 | Hypotheses .....                       | 5  |
| 18 | Outcomes .....                         | 5  |
| 19 | Study Design .....                     | 6  |
| 20 | Inclusion and Exclusion Criteria ..... | 6  |
| 21 | Inclusion. ....                        | 7  |
| 22 | Exclusion.....                         | 7  |
| 23 | Calcium .....                          | 7  |
| 24 | Intervention Drug, Vitamin D3 .....    | 8  |
| 25 | Measurements.....                      | 8  |
| 26 | Screening.....                         | 8  |
| 27 | Annual Assessments .....               | 8  |
| 28 | Sample size .....                      | 9  |
| 29 | Blood and Urine Sampling .....         | 9  |
| 30 | Anthropometry.....                     | 9  |
| 31 | DXA .....                              | 10 |
| 32 | HR-pQCT .....                          | 10 |
| 33 | Finite Element Analysis.....           | 12 |
| 34 | Biomarkers.....                        | 12 |
| 35 | Balance and Muscle Strength .....      | 12 |
| 36 | Questionnaires .....                   | 13 |
| 37 | Statistical Analysis .....             | 13 |
| 38 | Safety .....                           | 13 |
| 39 | Timeline and Reporting .....           | 15 |
| 40 | Outcome Measures .....                 | 16 |
| 41 | Publications .....                     | 16 |
| 42 | References .....                       | 17 |
| 43 | Additional References .....            | 18 |
| 44 | Summary of Protocol Changes.....       | 19 |
| 45 |                                        |    |
| 46 |                                        |    |
| 47 |                                        |    |

## 48 Introduction

49

50 Vitamin D is necessary for normal bone health and calcium/phosphate metabolism. Although  
51 that has remained the main focus of the recent Institute of Medicine (IOM) report (1,2), there  
52 remains major controversy regarding the optimum level of intake or measured blood levels of  
53 vitamin D to provide optimum bone health (3,4). In addition, it is becoming apparent that  
54 vitamin D is important for a wide variety of cell functions in many tissues and organ systems.  
55 Vitamin D receptors are present in many tissues and so is the 1-alpha hydroxylase enzyme  
56 which is necessary to synthesize the most active vitamin D metabolite, 1, 25(OH)<sub>2</sub> vitamin D.  
57 Although not as well studied as its effects on bone and mineral metabolism, it is clear that there  
58 is an association between vitamin D deficiency and a variety of medical disorders, including  
59 autoimmune disease (e.g. rheumatoid arthritis, type 1 diabetes mellitus, multiple sclerosis),  
60 cardiovascular disease and associated risk factors (e.g. hypertension, insulin resistance and type  
61 2 diabetes), and mental health disorders (e.g. depression). There is a potential role for  
62 optimizing vitamin D physiology/status in the prevention of a variety of these common  
63 conditions. As pointed out repeatedly in the Endocrine Society Guidelines, it is not certain what  
64 dose (if any) of vitamin D is needed for the potential prevention benefits of these non-skeletal  
65 disorders (4).

66 For prevention of the major bone disorders of vitamin D deficiency (osteomalacia and rickets  
67 for severe deficiency; and milder deficiency contributing to the fractures of osteoporosis), there  
68 remains disagreement among experts as to the optimal dose of vitamin D to recommend. The  
69 IOM report suggested vitamin D deficiency was not as prevalent as many experts believe, and  
70 suggested that the bone benefits of vitamin D (prevention of rickets, osteomalacia, and  
71 fractures) would be achieved for 97.5% of the population by an intake (all sources) of 600  
72 international units (IU) daily for adults under age 70 and 800 IU daily for adults over the age of  
73 70. The IOM report indicates that the average Canadian receives between 200 and 300 IU daily  
74 from diet, so if sunlight exposure contributes little vitamin D, a supplement intake of 400 IU  
75 would be more than adequate for the general population under age 70 years. The Osteoporosis  
76 Canada Guidelines and Endocrine Society Guidelines set that dose recommendation moderately  
77 higher (400 to 2000 IU daily as a general recommendation). The IOM and Endocrine Society  
78 disagree on the interpretation of one of the few studies relating vitamin D levels in blood to  
79 bone histology and pathology. This study of 675 autopsies found the presence of microscopic  
80 signs of severe vitamin D deficiency (osteomalacia) in a large proportion of people dying of  
81 disorders unrelated to bone disease (mostly trauma) in Germany (5). The authors indicated  
82 they saw signs of osteomalacia (severe vitamin D deficiency) only in individuals whose serum  
83 25-OH vitamin D (25OHD) was less than 75 nmol/L. The IOM re-interpreted the authors'  
84 conclusions, and suggested that 97.5% of the population would not have signs of severe vitamin  
85 D deficiency if the 25OHD levels were above 50 nmol/L, and used this finding to provide further  
86 support for their contention that a low dose supplement of vitamin D would be all that is  
87 needed to provide the bone benefits of vitamin D. The authors of the study and other experts  
88 do not agree with the IOM (4). A recent pooled analysis of vitamin D fracture prevention studies  
89 indicates that fracture prevention is only consistently seen when vitamin D intake is 800 IU

90 daily, or higher (6).

91 A major problem in the area of vitamin D and bone and mineral metabolism is that although  
92 clinicians and nutritionists have been trying to assess the vitamin D clinical trials the same way a  
93 pharmaceutical agent would be tested, no proper dose finding studies have been done, and  
94 dose-response studies have basically looked only at blood levels of 25-OHD and serum/urine  
95 calcium (1,3,4).

96 There have been no proper dose-finding studies for vitamin D in the examination of  
97 measureable effects upon bone, particularly with the kind of technology we propose to use.  
98 The upper range of vitamin D dose effects on bone has not been explored adequately.  
99 Attempting to define a dose for prevention of the most severe expression of bone  
100 complications of vitamin D deficiency (fractures, osteomalacia and rickets) is appropriate in  
101 formulating a public health recommendation when the evidence supporting higher doses is not  
102 readily obtainable, as the IOM concluded (1). However, this is not the ideal way to define the  
103 optimal level of vitamin D intake for bone health or other potential benefits of vitamin D. Some  
104 have suggested that higher doses than the current recommendations may provide more  
105 benefit. Although the IOM raised the Tolerable (safe) Upper Intake Level (TUL) to 4,000 IU/day  
106 (TUL is a dose which would be free of adverse effects and would not require medical  
107 monitoring) (7), others have suggested that a more appropriate TUL would be 10,000 IU/day,  
108 and noted that apart from patients with disease that alter vitamin D metabolism (e.g.  
109 sarcoidosis), no cases of vitamin D toxicity have been clearly documented with doses less than  
110 around 40,000 IU/day (8). Doses above 4,000 IU/day are commonly used in patients with  
111 multiple sclerosis, in the belief that this may reduce the severity or frequency of relapses, and  
112 many people are consuming doses in the 5-10,000 IU/day range on the assumption of unproven  
113 health benefits. There have been very few well-designed studies examining the potential  
114 benefits of higher doses of vitamin D, but small studies are being performed in patients with  
115 multiple sclerosis and have suggested there may be beneficial effect on immune response in  
116 multiple sclerosis patients (9,10). Further, in one of these studies (11) an increasing dose of up  
117 to 40,000 IU/day was used before giving 10,000 IU daily for up to 9 months. The dose averaged  
118 to approximately 14,000 IU/day for one year, and was shown to have no appreciable effect on  
119 serum calcium or urine calcium excretion (11). In this study, the mean value of serum 25OHD  
120 was 179 nmol/L and almost all subjects achieved a level above 100 nmol/L (11).

121 The three doses chosen in our study are aimed at getting almost all subjects above target levels  
122 of serum 25OHD of 50 nmol/L (the IOM recommendation), 75 nmol/L (4,000 IU/day should do  
123 this), and 100 nmol/L (the 10,000 IU/day dose).

124 There is a strong association between vitamin D deficiency and a number of cancers. One small  
125 randomized controlled clinical trial found vitamin D supplementation at 1100 IU daily was  
126 associated with a significant reduction in all cancers (12), but the study has been criticized for  
127 being too small (IOM report). The IOM report also called attention to several studies showing  
128 an association between higher levels of 25OHD and pancreatic and prostate cancers. Although  
129 the present study is too small for cancer incidence to be a primary outcome variable, we will

130 capture cancers as adverse events and be able to identify any incidence trends in the three  
131 groups.

132 Because we have access to a state-of-the-art method of assessing cortical and trabecular bone  
133 without subjecting the patient to a bone biopsy (HR-pQCT), we feel it is appropriate to use it to  
134 assess the effects of increasing doses of vitamin D on bone, parameters of mineral metabolism  
135 and quality of life (QOL) and depression parameters. We propose to use the vitamin D dose  
136 recommended by IOM for adults under age 70 years (400 IU of supplement, assuming at least  
137 200 IU from diet), 4,000 IU/day (the TUL identified as safe by the IOM and now adopted by  
138 Health Canada), and 10,000 IU/day (the proposed TUL by Hathcock et al. (8)). Although there is  
139 certainly evidence that 10,000 IU/day is safe, we will continue to monitor our subjects for  
140 changes in urine and serum calcium.

## 141 Hypotheses

- 142 1. It is hypothesized that vitamin D, in a dose-dependent manner, will suppress parathyroid  
143 hormone action, resulting in less bone turnover, and decreased cortical porosity, leading to  
144 improved bone strength as assessed by finite element analysis.
- 145 2. It is hypothesized that vitamin D, in a dose-dependent manner, will increase bone density in  
146 the central skeleton (spine, hip), as measured by the current standard method of dual X-ray  
147 absorptiometry (DXA).
- 148 3. It is hypothesized that vitamin D, in a dose-dependent manner, will have an impact on quality  
149 of life, including indices of depression, as measured by the SF-36 questionnaire and an  
150 appropriate index of depression.

151

## 152 Outcomes

153 **Primary outcome** will be a non-invasive assessment of bone density and strength, as measured  
154 by HR-pQCT.

155 **Secondary outcomes** will be trabecular and cortical bone, as measured by HR-pQCT, areal  
156 bone mineral density as measured by DXA, parameters of calcium metabolism, including  
157 biochemical markers of bone turnover, balance, and quality of life.

158

## 159 Study Design

160

161 **A clinical trial open to healthy men and women 55 to 70 years of age, with serum 25[OH]D**  
162 **under 125 nmol/L and above 30 nmol/L.**

163

164 The study will be a randomized, double-blind clinical trial. A total of up to 375 men and women  
165 will be randomly assigned to one of three treatment groups, each receiving one of the following  
166 daily doses: 400 IU vitamin D, 4,000 IU vitamin D, and 10,000 IU vitamin D. The study will be  
167 registered with the NIH Clinical Trials Registry.

168

169 We will include a pilot group which will consist of up to 75 men and women. This is necessary  
170 because, due to manufacturer error in the Canadian certification application, the second  
171 generation HR-pQCT (XtrememeCT2), which was to be used in the original study design has not  
172 yet been certified for use in Canada. We will therefore randomize up to 75 people in this pilot  
173 cohort. Pilot study subjects will be scanned using the HR-pQCT first generation (XtremeCT1).

174

175 Once the XtremeCT2 is certified we will scan the pilot group on both scanners at 6 and 12  
176 months. (See further explanation of radiation involved using the two XtremeCT machines in the  
177 HR pQCT section). The objective of this pilot cohort will be to compare results from XtremeCT1  
178 to XtremeCT2. This will allow us to (a) make a comparison on a cross-sectional basis and (b)  
179 determine whether there is any additional sensitivity to longitudinal changes using XtremeCT2  
180 compared to XtremeCT1. Additionally, we will have a clean dataset of XtremeCT1 image data at  
181 6 and 12 months which can be used to determine if there is an early treatment effect of groups  
182 A,B and C.

182

## 183 Inclusion and Exclusion Criteria

184 Women and men will be generally healthy and between 55 and 70 years of age; women will be  
185 at least 5 years post-menopause. Both men and women will have a baseline lumbar spine and  
186 total hip bone mineral density (BMD) T-score above  $-2.5$  SD assessed using dual x-ray  
187 absorptiometry (DXA), and a serum 25-[OH] vitamin D (25OHD) of  $>30$  nmol/L (12 ng/mL). The  
188 recent Institute of Medicine (IOM) report claimed that a level of 40 nmol/L (16 ng/mL) is  
189 indicative of adequate bone protective vitamin D nutrition for at least 50% of the population,  
190 50 nmol/L (20 ng/mL) for 97.5% of the population; and that individuals under age 70 years  
191 would achieve an average serum 25OHD of 50 nmol/L by receiving 600 IU/day from all sources  
192 (diet plus supplements).

193

194 People will be excluded from the study if they are found to be at high risk ( $>20\%$ ) for fracture,  
195 as defined by the Canadian FRAX 10-year fracture risk calculator, or have taken bone active  
196 osteoporosis prescription drugs in the past 2 years (bisphosphonates) or 1 year (other  
197 osteoporosis prescription therapies).

198

199 The following is a list of inclusion/exclusion criteria:

200 *Inclusion.*

- 201 1. Healthy women and men between 55 and 70 years of age; women will be at least 5 years
- 202 post-menopause. Presence of a chronic illness does not exclude participation if the condition is
- 203 stable and managed by a physician.
- 204 2. Subjects will have a baseline lumbar spine and total hip bone mineral density (BMD) assessed
- 205 using dual x-ray absorptiometry (DXA), and will be eligible if their T-score is above  $-2.5$  SD.

206 *Exclusion.*

- 207 1. A serum 25-[OH] vitamin D (25OHD) of  $<30$  nmol/L ( $<12$  ng/mL) or  $>125$  nmol/L (50 ng/mL).
- 208 2. Hypercalcemia (serum calcium  $>2.55$  mmol/L), hypocalcemia (serum calcium  $<2.10$  mmol/L)
- 209 or eGFR  $<30$  mL/min.
- 210 3. Surgical cure of Primary Hyperparathyroidism within the last year.
- 211 4. Known hypersensitivity or allergy to Vitamin D
- 212 5. Serum creatinine, AST, ALT, PTH, calcium, or alkaline phosphatase greater than 1.5 times the
- 213 upper limit of normal at the screening visit
- 214 6. BMD exclusions:
  - 215 (a) High ( $\geq 20\%$ ) 10-year risk for osteoporotic fracture, as defined by the World Health
  - 216 Organization's Canadian FRAX calculator.
  - 217 (b) DXA T-score below or equal to  $-2.5$  at lumbar spine, Total Hip or Femoral Neck
  - 218 These individuals would be more likely to be prescribed osteoporosis drug by their primary care
  - 219 physician.
- 220 7. Have taken bone active osteoporosis prescription drugs in the past 2 years (bisphosphonates)
- 221 or 1 year (other osteoporosis prescription therapies). Post-menopausal estrogen/progesterone
- 222 therapy is not an exclusion if the subject's intention is to carry on with this therapy for the
- 223 proposed duration of the study, but if this therapy is stopped during the study the subject
- 224 would be withdrawn from the study.
- 225 8. Any medical condition that would prevent participation in a clinical trial for a full three years.
- 226 9. Medications such as prednisone  $>2.5$  mg daily (or equivalent); other bone active medications
- 227 such as tamoxifen or aromatase inhibitors for breast cancer, or androgen deprivation therapy
- 228 of prostate cancer.
- 229 10. Disorders known to affect vitamin D metabolism such as sarcoidosis or renal failure or
- 230 malabsorption disorders (e.g. pancreatic insufficiency or celiac disease).
- 231 11. Regular (monthly or more frequent) use of tanning salons.
- 232 12. Consumption of vitamin D supplements at a dose  $\geq 2000$  IU/day for the past 6 months.
- 233 13. Active kidney stone disease (documented kidney stone within the last 2 years)

234

235 *Calcium*

236 All subjects will have adequate calcium intake as defined by the Institute of Medicine (total of

237 1200 mg/day). A brief dietary history will be taken and subjects will be instructed to take an

238 appropriate dose of supplemental calcium if their daily intake is less than 1200 mg/day (the

239 IOM's Recommended Daily Allowance for this study population).

240

## 241 Intervention Drug, Vitamin D3

242 For adults under age 70 years, the recent IOM report (1) recommends a total intake of 600 IU  
243 vitamin D/day will provide all the vitamin D needed for bone health, and since the typical  
244 Canadian diet contains between 200 and 300 units of vitamin D, the subjects in the lowest dose  
245 arm of our study will receive 400 IU/day. The other two groups will receive 10,000 IU and 4,000  
246 IU, respectively. The 10,000 IU dose is the tolerable upper intake level (TUL) recommended by  
247 Hathcock et al (8) and 4,000 IU is the IOM's recommended TUL. Health Canada approval for the  
248 use of a daily 10,000 IU dose will be sought, and is expected to be provided based on past  
249 experience of the investigators.

250

## 251 Measurements

### 252 *Screening*

253 It is anticipated that an upper limit of 700 people from the Calgary region will need to be  
254 screened. The subjects will be recruited from the general population by means of posters,  
255 internet resources, and other means of public information (i.e., television advertisement). The  
256 screening process will ensure that subjects meet the inclusion criteria described above. Each  
257 participant into the study will be randomized into one of the three study arms, and there will be  
258 an equal number of men and women in each of those study arms. At screening, standard lab  
259 tests will be done including:

- 260 • Serum: AST, ALT, BUN, Creatinine, 25OHD, albumin, calcium, phosphate, Alkaline  
261 Phosphatase, glomerular filtration rate (GFR, calculated value from serum creatinine)
- 262 • Urine: calcium, creatinine, urinalysis for hematuria
- 263 • Parathyroid hormone (PTH) levels

264 Furthermore, an ECG will be performed at screening visit.

265

## 266 Annual Assessments

267 The screening study will provide a total of N=300 volunteers who will receive annual  
268 assessments. The pilot cohort up to 75 men and women will receive the same assessments as  
269 the original 300 subjects.

270

271 The exceptions to the annual assessment will be in the first year when a 3- and 6-month  
272 assessment will also be performed. Additionally, study visits at 18 and 30 months will be  
273 performed for additional safety monitoring of pertinent serum and urine  
274 biochemistry parameters (see testing as outlined below). The assessments will include a  
275 questionnaire (SF-36; described more later) and an assessment of biomarkers (described more  
276 later).

277



## 278 Sample size

279 The three study arms will each include up to 125 subjects (a total of 375 subjects). This number  
280 of subjects provides sufficient statistical power to assess a dose-dependent effect of vitamin D.  
281 The size of the study is also tempered by the capacity to perform annual measurements at our  
282 facilities for 375 people.

283

## 284 Blood and Urine Sampling

285 A total of 50 mL of whole blood will be drawn at any time point when blood sampling is  
286 scheduled. After the blood is drawn it will be centrifuged and then serum will be aliquotted into  
287 tubes. Some tests will be done as soon as possible after the blood draw for safety monitoring  
288 (e.g. serum calcium, creatinine, phosphate) or if the test item deteriorates with long term  
289 storage (e.g. serum PTH). Samples not needed for monitoring of safety (e.g. markers of bone  
290 turnover) will be frozen until completion of data collection at -80°C. Blood sampling will be  
291 performed in the screening cohort, and at time points of 3- and 6-month for the purposes of  
292 safety monitoring. Subsequently, blood sampling will be performed on an annual basis for three  
293 years. A fasting second voided urine specimen will be taken in the morning on each of the visits  
294 in the first year, for measurement of calcium to creatinine ratio to rule out hypercalciuria.  
295 Blood for DNA will be collected at baseline

296

## 297 Anthropometry

298 Height, weight and limb lengths (radius and tibia) of all subjects will be measured. For the  
299 height measurement subjects will be asked to remove their socks and shoes and stand with  
300 their heels together and arms at side in front of the stadiometer. Heel, buttocks, upper part of  
301 the back, but not necessarily the back of the head, are in contact with the wall. The subject will  
302 be instructed to look straight ahead, take a breath, and to stretch up as far as possible keeping  
303 their heels on the ground. It will be assured that the subject's heels are not elevated and the  
304 headboard will be brought down, crushing the hair. The height will be recorded twice to the  
305 nearest 0.1 cm. If the two readings are not within 0.4 cm, a third reading will be taken. For the  
306 weight measurements the subjects will be asked to remove their shoes and empty their pockets  
307 before stepping onto the scale. The weight will be recorded two times to the nearest 0.1 kg.  
308 The tibial length of both legs will be measured from the tibial plateau to the distal edge of the  
309 medial malleolus and the radius length will be measured as the distance from the ulnar styloid  
310 process to the olecranon process. These measurements will be obtained using a standard  
311 anthropometric tape measure and will be recorded to the nearest 0.1 cm. If the two readings  
312 are not within 0.4 cm, a third measurement will be taken.

313

314 DXA

315 Dual energy X-ray absorptiometry (DXA) will be used to scan the distal radius, lumbar spine and  
316 the proximal femur. From the scan of the lumbar spine and left proximal femur (~ 1 min), aBMD  
317 (g/cm<sup>2</sup>) will be used to determine a subject-specific T-score (aBMD compared to reference  
318 mean for a young healthy adult) and this value will be compared to standard World Health  
319 Organization criteria to classify each subject as normal (T-score>-1), osteopenic (-1 < T > -2.5) or  
320 osteoporotic (T score < -2.5). The combined radiation dose associated is less than 25 μSv. Scans  
321 will be completed at baseline, months 12, 24 and 36. A whole-body scan will be performed to  
322 determine lean mass and body composition at baseline and at the end of the study (month 36).  
323

324 HR-pQCT

325 High resolution peripheral quantitative computed tomography (HR-pQCT, XtremeCT, Scanco  
326 Medical, Switzerland) will be used to obtain bone quality parameters such as volumetric bone  
327 density, trabecular thickness (Tb.Th), trabecular number (Tb.N), cortical thickness (CtTh),  
328 cortical porosity (CtPo) and estimated bone strength from the finite element analysis at tibia  
329 and radius from all subjects. All scans will be performed at baseline, and at months 6, 12, 24,  
330 and 36. The pilot cohort will have duplicate scans on both the Xtreme CT1 and Xtreme CT2  
331 machines as well as Xtreme CT2 scans at months 6, 12, 24 & 36.

332 The HR-pQCT measurements will provide high-resolution 3D images of the trabecular and  
333 cortical bone structure in 9 mm measurement regions of the tibia and radius (left and right).  
334 The nominal resolution of the system is 80 micrometers isotropic resolution (in-plane and  
335 between plane resolutions are the same). Participants will sit in a chair while placing their lower  
336 leg or their forearm in the XtremeCT system gantry while data is acquired. The local delivered  
337 dose from the HR-pQCT (XtremeCT1) system is 6.1 mGy per 9.020 mm image stack (Dr. Leszek  
338 Hahn, University of Calgary). At the tibia and the radius there are three different tissues, bone,  
339 skin and other tissues (fat, muscle) with corresponding weighting factors for effective dose of  
340 0.01, 0.01 and 0.05 (according to ICRP91). The estimated fraction of total body skin, bone and  
341 other tissues exposed to the radiation are 1/1000, 1/500 and 1/1000. Therefore to calculate the  
342 effective dose the following equation is used:

343       Effective dose = measured radiation \* (weighting factor of tissue 1\*percentage of tissue  
344       scanned + weighting factor of tissue 2\*percentage of tissue scanned + weighting factor  
345       of tissue 3\* percentage of tissue scanned)

346 To convert from mGy to μGy the effective dose must be divided by 1000.

347       Effective dose = 6.1mG \* (0.01\*1/1000 + 0.01\*1/500 + 0.05\* 1/1000) = 6.1mGy \*0.08 \*  
348       1/1000 = 0.5 μGy = 0.5μSv

349  
350 This results in an effective dose of 0.5 μSv which is 1000 times lower then the measured dose.  
351 However, it is difficult to measure the effective dose from stray radiation so a value of 3 μSv for  
352 each examined (radius and tibia) is used for measurments on XtremeCT1. There is a slightly  
353 higher effective dose for XTremeCT2 because of the increased area scanned. We will use a  
354 maximum of 5μSv estimate for each examined area. The recommended effective dose limit for

355 occupational exposure to the foot (no data is available for foreleg) is 500mSv. Assuming that  
356 the recommended dose for the general public is 10 times lower, this results in a recommended  
357 dose of 50 mSv (ICRP). At the radiation type and the energy used with the XtremeCT the units  
358 Gy can be converted with a factor of 1 into Sv. If the measured dose and not effective dose is  
359 again used for safety, this results in  $50 \text{ mSv} / 6.1 \text{ mSv} = 8$  measurements per subject per site per  
360 year. The maximum any subject in our study will be scanned is 4 times per site per year. This is  
361 half of the recommended dose.

362  
363 Although only one scan is planned per year, a 2<sup>nd</sup> scan per scanning appointment may be used  
364 in special cases where subject movement artifact may occur.

365  
366 As a point of reference, the normal background radiation that a person receives per year in  
367 Calgary is 2-3 mSv. A transatlantic flight will result in about 50  $\mu\text{Sv}$  effective dose and a chest X-  
368 ray results in about 20  $\mu\text{Sv}$ .

369  
370  
371 The outcome measures of the HR-pQCT scans are morphological parameters such as trabecular  
372 thickness (Tb.Th), trabecular number (Tb.N), bone volume ratio (bone volume / trabecular  
373 volume (BV/TV) and estimated bone strength from the finite element analysis. To determine  
374 morphological parameters from the scans, the trabecular portion has to be isolated from the  
375 cortical shell of the bone in order to analyze the components separately. The segmentation will  
376 be done by applying a contouring method using an auto-segmentation algorithm applied to the  
377 3D HR-pQCT images. This analysis requires the transformation to binary images in which the  
378 pixels are either black (representing marrow) or white (representing bone tissue). This will be  
379 done by applying a Gaussian filter and threshold to the grayscale images. The binary images can  
380 then be analyzed and morphological parameters (cortical porosity, cortical thickness, bone  
381 volume to total volume ratio, trabecular thickness, trabecular spacing and trabecular number)  
382 can be determined. These standard HR-pQCT morphological outcomes were validated against  
383 gold-standard  $\mu\text{CT}$  imaging.

384  
385 All data analysis is done post-measurement and therefore does not require subject  
386 participation. These measurements are performed on computers using software supplied by  
387 the HR-pQCT manufacturer and additional software developed by the principal investigator.

388  
389 In summary, the maximum effective radiation dose to subjects being examined on XtremeCt2 is  
390 10 (radius and tibia) (for each examination). The additional radiation dose to subjects in the  
391 pilot cohort at the 6 and 12 month time points: tibia and radius scan by XtremeCT1 will be  $2 \times$   
392  $3 \mu\text{Sv} = 6 \mu\text{Sv}$ . Please note that all radiation doses are approximate, as are any radiation doses  
393 for medical devices and are based on our testing done internally as well as manufacturer's  
394 provided data. As noted above these estimates are probably much greater than actual  
395 exposure.

396  
397

## 398 Finite Element Analysis

399 In order to estimate bone strength, all HR-pQCT images will be put into a custom finite element  
400 program, in which a linear model can be created from the HR-pQCT scan using the voxel  
401 conversion approach. It incorporates the 3D microarchitecture and local density of the scanned  
402 bone region. Finite element analysis estimates the ultimate bone strength according to bone  
403 microarchitecture, defined boundary conditions and material properties of the model.

404

405 The models will be solved using custom large-scale finite element software (FAIM, v6) on a  
406 desktop workstation. Using our custom software, the tibia and radius models will require  
407 approximately 20 minutes to solve. Stiffness (N/mm) will be calculated as the reaction force  
408 (RFz) determined by the finite element model at 1% strain divided by the bone cross sectional  
409 area from the morphologic analysis. The stiffness value will be used to calculate apparent bone  
410 strength (ultimate stress, MPa) based on an established linear relationship.

411

## 412 Biomarkers

413 Blood serum will be assessed to investigate effects of vitamin D effect on calcium metabolism  
414 and bone: Serum PTH, 25OHD, calcium creatinine, phosphate, albumin.

415 Biomarkers of bone turnover will be assessed. N-terminal propeptide of type 1 collagen (PINP)  
416 is a bone formation marker and will be analyzed from serum using a commercial assay. C-  
417 telopeptide of type 1 collagen (CTX) is a bone resorption marker and will be analyzed from  
418 serum using a commercial assay. PINP and CTx measurements are considered the best currently  
419 available markers of the two components of bone turnover (10). Due to budget reasons we  
420 were unable to attain P1NP data.

421

## 422 Balance and Muscle Strength

423 The influence of vitamin D on the physical balance of the subjects will be semi-quantified by  
424 performing four balance tests at baseline and annually. These tests include standing with (a)  
425 two feet on the force platform with eyes open, (b) two feet on the force platform with eyes  
426 closed, (c) two feet on a foam pad with eyes open, and (d) two feet on a foam pad with eyes  
427 closed. All tests will be performed 3 times, and a blindfold will be used for all eyes-closed  
428 assessments. The total testing time is approximately 15 minutes.

429

430 Tests of strength will be performed at baseline and annually (grip strength and Timed Up and  
431 Go).

432

## 433 Questionnaires

434 All questionnaires will be administered by an interviewer. Semi-quantitative measures of  
435 quality of life (QoL), depression, and food frequency will be assessed on entry, and then  
436 annually thereafter.

- 437 a) Quality of Life (QoL) questionnaire: The QoL questionnaire will be the SF-36.
- 438 b) Depression questionnaire: Beck Depression Inventory (BDI-II) or PHQ-9.
- 439 c) Food Frequency questionnaire (FFQ): The FFQ records the food intake  
440 especially of nutrients rich in calcium in order to estimate calcium intake.

441 The depression questionnaire will be performed at 3 and 6 months to monitor whether there is  
442 an early change in depression score.

443

## 444 Statistical Analysis

445 Statistical analysis will be used for all data. All acquired data (e.g. bone quality parameters,  
446 bone density, bone markers) of the three groups will be compared. Refer to the statistical  
447 analysis plan for specific details. Results will be considered statistically significant at  $p < 0.05$ .

448

## 449 Safety

450 The main concern in safety of vitamin D consumption is the avoidance of toxicity in the form of  
451 hypercalcemia or renal damage, related to hypercalcemia and hypercalciuria. Two of the doses  
452 in this study are generally accepted as safe and not requiring any medical safety monitoring.  
453 The 10,000 IU daily dose exceeds the IOM recommended upper limit of safe, unsupervised  
454 vitamin D intake (hence, this trial includes clinical supervision as detailed below). Although the  
455 IOM report selected 4,000 IU/day as the TUL, there is reasonable evidence that 10,000 IU/day is  
456 not associated with toxicity in clinical trials (7,8,9), and some have proposed this dose as a more  
457 appropriate tolerable upper intake level (8). No cases of vitamin D toxicity have been clearly  
458 documented with doses less than around 40,000 IU/day (8). Further, in a small study examining  
459 the effect of vitamin D supplements on serum 25OHD, a dose of 10,000 IU/day caused an  
460 apparent plateau in 25OHD levels at around 250 nmol/L after 120 days of treatment (Heaney et al,  
461 "Additional Reference" # 4). This leads us to believe that if signs of vitamin D toxicity or  
462 excessive rise in 25OHD were to occur on this dose, we would expect them to occur within the  
463 first three or six months of the study and identified by the serum and urine testing. However,  
464 we will continue to monitor for safety at 12, 18, 24, 30 and 36 months.

465

466 We will monitor safety at each visit with a fasting morning sample collection for:

- 467 • Serum: AST, ALT, BUN, Creatinine, 25OHD, albumin, calcium, Phosphate, Alk Phos,  
468 glomerular filtration rate (GFR, calculated value from serum creatinine).
- 469 • Hemoglobin A1C and fasting glucose obtained at baseline, 3, 6, 12, 24 and 36 months.
- 470 • 24 hour urine calcium, and creatinine; urinalysis for hematuria. If the subject declines a  
471 24 hour urine calcium measurement, a morning second voided fasting urine calcium to  
472 creatinine ratio will be measured.
- 473 • Parathyroid hormone (PTH) levels

474 Additionally, the routine interview will assess for any change in medical condition (e.g. the  
475 occurrence of kidney stones). An ECG will be performed for any patient who develops  
476 hypercalcemia during the treatment period.

477

478 Criteria for assessment of need for withdrawal/discontinuation of a subject from the trial:

479 1. Hypercalciuria is the first indication of vitamin D excess and occurs before the  
480 development of hypercalcemia. Hypercalciuria is defined by a 24 hour urine calcium  
481 exceeding 7.5 mmol/day (for individuals over 75 kg body weight, 24 hour urine  
482 exceeding 0.1 mmol/kg body weight/24 hours) or, for individuals not able to do a 24  
483 hour calcium collection, a calcium to creatinine ratio  $\geq 1.0$ . These individuals will be  
484 questioned regarding excess calcium intake, and a repeat collection performed. If  
485 hypercalciuria persists on the second collection, the subject will be withdrawn from the  
486 study.

487

488 If calcium to creatinine ratio is used, a value of  $\geq 1.0$  will be the criterion for a similar sequence  
489 of investigations and if the repeated measurement is  $\geq 1.0$ , the subject will be withdrawn from  
490 the study (see "Additional References" numbers 1 and 2 below).

491

492 2. Hypercalcemia, defined as a serum albumin-corrected calcium above 2.55 mmol/L (the  
493 upper limit of the normal range), will be treated the same way as hypercalciuria  
494 (repeated serum calcium after checking for excess calcium intake) and if hypercalcemia  
495 persists, the subject will be withdrawn from the study.

496

497 3. Serum 25OHD  $>450$  nmol/L in the absence of any abnormality of calcium metabolism  
498 will be repeated, and if persistent, the subject will be withdrawn from the study.  
499 According to Hathcock et al (8) and Vieth (reference #3 in "Additional References"), no  
500 well-documented cases of vitamin D toxicity have been reported with levels under 500  
501 nmol/L In the Phase I/II clinical trial of high dose vitamin D in multiple sclerosis  
502 ("Additional Reference" # 1), a mean peak level of 413 nmol/L was reached in the  
503 subjects receiving 40,000 IU daily, with no adverse effect on calcium metabolism or any  
504 other symptomatology]

505

506 4. A repeated rise in serum creatinine AST, ALT, or phosphate to above 1.5 times the upper  
507 limit of normal will be a criterion for withdrawal from the study.

508

509 A Data Safety and Monitoring Board (DSMB) will be set up, and Dr. Doreen Rabi has agreed to  
510 chair this.

511

512 **Timeline and Reporting**

513 The following outlines the timeline for the 3 year study, including the processes for acquiring  
 514 ethics approval and screening. Thus, the total time to conduct the study is estimated to be 4  
 515 years. This timeline is approximate because the time for receiving approval from the ethics  
 516 board is not predictable. All times will be adjusted according to when final protocol approval is  
 517 in place.

| Time (months) | Study (months) | Notes                        | Quest (min) | Blood (min) | DXA (min) | XCT (min) | Balance (min) | Total Visit (min) | Reports / Publications        |
|---------------|----------------|------------------------------|-------------|-------------|-----------|-----------|---------------|-------------------|-------------------------------|
| 0             |                | Submit ethics protocol       |             |             |           |           |               |                   |                               |
| 4             |                | Ethics protocol approved     |             |             |           |           |               |                   |                               |
| 6             |                | Equipment and staff in place |             |             |           |           |               |                   |                               |
| 6             |                | Commence screening           | 40          | 15          | 20        |           |               | 75                |                               |
| 12            |                | Complete screening           |             |             |           |           |               |                   |                               |
| 12            | 0              | Start of main study protocol | 40          | 15          | 30        | 30        | 15            | 130               |                               |
| 15            | 3              | Safety check, 10000 IU       |             | 15          |           |           |               | 15                |                               |
| 18            | 6              | Safety check, 10000 IU       |             | 15          |           |           |               | 15                |                               |
| 24            | 12             | 1 year follow-up             | 40          | 15          | 30        | 30        | 15            | 130               |                               |
| 36            | 24             | 2 year follow-up             | 40          | 15          | 30        | 30        | 15            | 130               |                               |
| 48            | 36             | 3 year follow-up             | 40          | 15          | 30        | 30        | 15            | 130               |                               |
| 51            | 39             | Study completed, unblinding  |             |             |           |           |               |                   | Final report and publications |

NOTE:

Timing of final approval of ethics protocol is beyond our control. All subsequent time points will be adjusted based on date of final approval. Unblinding is required to provide scientific analysis of the results. This can only be done at end of study. Each visit of 300 subjects will take approximately 5 months of intense data collection.

518  
 519  
 520  
 521  
 522  
 523  
 524  
 525  
 526  
 527  
 528  
 529

Annual reports will be provided to the study sponsors upon request including the following information:

1. A summary of current participants enrolled including descriptives of age and sex.
2. A report of the cumulative data points collected for outcome measures from HR-pQCT, DXA, biomarkers and balance. Since these data will be collected in a blind fashion, there will not be any quantitative results provided (i.e., we will not be able to separate the results into the three study arms for analysis of a dose-dependent response).

530 Outcome Measures

531 The following is a summary of all outcome measures that will be collected for the study.

|                |                         |                                   |                       |                  |                                    |            |
|----------------|-------------------------|-----------------------------------|-----------------------|------------------|------------------------------------|------------|
| <b>HR-pQCT</b> | BMD                     | Bone mineral density              | <b>Questionnaires</b> | QoL              | Quality of life, from SF-36        |            |
|                | Cl.BMD                  | Cortical bone mineral density     |                       | Depression       | Semi-quantitative depression       |            |
|                | Tb.BMD                  | Trabecular bone mineral density   |                       | FFQ              | Food frequency questionnaire       |            |
|                | BV/TV                   | Bone volume fraction              |                       | <b>Biomarker</b> | serum calcium                      | biomarkers |
|                | Tb.Th                   | Trabecular thickness              |                       |                  | creatinine                         | biomarkers |
|                | Tb.N                    | Trabecular number                 |                       |                  | phosphate                          | biomarkers |
|                | Tb.Sp                   | Trabecular separation             |                       |                  | serum PTH                          | biomarkers |
| Cl.Th          | Cortical thickness      | 25-[OH]D                          | biomarkers            |                  |                                    |            |
| Cl.Po          | Cortical porosity       | albumin                           | biomarkers            |                  |                                    |            |
| <b>FEM</b>     | RFz                     | Total reaction force to 1% strain | P1NP                  | bone formation   |                                    |            |
|                | RFz.cort                | Cortical bone reaction force      | CTx                   | bone resorption  |                                    |            |
|                | RFz.trab                | Trabecular bone reaction force    | <b>Anthropometry</b>  | height           | cm                                 |            |
|                | Failure load            | Maximum load until yield          |                       | weight           | kg                                 |            |
| Stiffness      | Apparent bone stiffness | limb lengths                      |                       | cm               |                                    |            |
| <b>DXA</b>     | Femoral_BMD             | Areal bone mineral density        | <b>Balance</b>        | CTSIB            | Clin test sensory integ of balance |            |
|                | L1-4_BMD                | Areal bone mineral density        |                       | CTSIB vs norm    | Normative data comparison          |            |
|                | Radius_BMD              | Areal bone mineral density        |                       |                  |                                    |            |

532

533

534 Publications

535 The authors reserve the right to publish the results of this trial in a timely fashion at a top-rated  
 536 peer-reviewed journal. The publication will be prepared whether or not there is a clear dose-  
 537 dependent effect of vitamin D on measured health parameters. The study sponsors will not be  
 538 authors on publications derived from this work.

539

540



541 **References**

542 1. IOM 2011 Dietary reference intakes for calcium and vitamin D. IOM (Institute of  
543 Medicine). The National Academies Press, Washington, DC.

544 2. Ross AC, Manson JE, Abrams SA, Aloia JF, Brannon PM, Clinton SK, Durazo-Arvizu RA,  
545 Gallagher JC, Gallo RL, Jones G, Kovacs CS, Mayne ST, Rosen CJ, Shapses SA 2011 The 2011  
546 report on dietary reference intakes for calcium and vitamin D from the Institute of Medicine:  
547 what clinicians need to know. *J Clin Endocrinol Metab* 96(1):53-8.

548 3. Hanley DA, Cranney A, Jones G, Whiting SJ, Leslie WD 2010 Vitamin D in adult health and  
549 disease: a review and guideline statement from Osteoporosis Canada (summary). *CMAJ*  
550 182(12):1315-9.

551 4. Holick MF, Binkley NC, Bischoff-Ferrari HA, Gordon CM, Hanley DA, Heaney RP, Murad  
552 MH, Weaver CM 2011 Evaluation, treatment, and prevention of vitamin D deficiency: an  
553 Endocrine Society clinical practice guideline. *J Clin Endocrinol Metab* 96(7):1911-30.

554 5. Priemel M, von Demarus C, Klatter TO, Kessler S, Schlie J, Meier S, Proksch N, Pastor F,  
555 Netter C, Streichert T, Puschel K, Amling M 2010 Bone mineralization defects and vitamin D  
556 deficiency: histomorphometric analysis of iliac crest bone biopsies and circulating 25-  
557 hydroxyvitamin D in 675 patients. *J Bone Miner Res* 25(2):305-12.

558 6. Bischoff-Ferrari HA, Willett WC, Orav EJ, Lips P, Meunier PJ, Lyons RA, Flicker L, Wark J,  
559 Jackson RD, Cauley JA, Meyer HE, Pfeifer M, Sanders KM, Stahelin HB, Theiler R, Dawson-  
560 Hughes B 2012 A pooled analysis of vitamin D dose requirements for fracture prevention. *N*  
561 *Engl J Med* 367(1):40-9.

562 7. Vieth R, Kimball S, Hu A, Walfish PG 2004 Randomized comparison of the effects of the  
563 vitamin D3 adequate intake versus 100 mcg (4000 IU) per day on biochemical responses and  
564 the wellbeing of patients. *Nutr J* 3:8.

565 8. Hathcock JN, Shao A, Vieth R, Heaney R 2007 Risk assessment for vitamin D. *Am J Clin*  
566 *Nutr* 85(1):6-18.

567 9. Kimball S, Vieth R, Dosch HM, Bar-Or A, Cheung R, Gagne D, O'Connor P, D'Souza C,  
568 Ursell M, Burton JM 2011 Cholecalciferol plus calcium suppresses abnormal PBMC reactivity in  
569 patients with multiple sclerosis. *J Clin Endocrinol Metab* 96(9):2826-34.

570 10. Smolders J, Hupperts R, Barkhof F, Grimaldi LM, Holmoy T, Killestein J, Rieckmann P,  
571 Schlupe M, Vieth R, Hostalek U, Ghazi-Visser L, Beelke M 2011 Efficacy of vitamin D(3) as add-  
572 on therapy in patients with relapsing-remitting multiple sclerosis receiving subcutaneous  
573 interferon beta-1a: a Phase II, multicenter, double-blind, randomized, placebo-controlled trial. *J*  
574 *Neurol Sci* 311(1-2):44-9.

575 11. Kimball SM, Burton JM, O'Connor PG, Vieth R 2011 Urinary calcium response to high  
576 dose vitamin D3 with calcium supplementation in patients with multiple sclerosis. *Clin Biochem*  
577 44(10-11):930-2.

578 12. Lappe JM, Travers-Gustafson D, Davies KM, Recker RR, Heaney RP 2007 Vitamin D and  
579 calcium supplementation reduces cancer risk: results of a randomized trial. *Am J Clin Nutr*  
580 85(6):1586-91.

581

582 Additional References

- 583 1. Burton JM, Kimball S, Vieth R, Bar-Or A, Dosch HM, Cheung R, Gagne D, D'Souza C, Ursell M,  
584 O'Connor P. A phase I/II dose-escalation trial of vitamin D3 and calcium in multiple sclerosis.  
585 Neurology. 2010 Jun 8;74(23):1852-9. Epub 2010 Apr 28. Erratum in: Neurology. 2010 Sep  
586 14;75(11):1029. Dosage error in article text. Neurology. 2010 Aug 3;75(5):480.  
587
- 588 2. Kimball SM, Burton JM, O'Connor PG, Vieth R. Urinary calcium response to high dose vitamin  
589 D3 with calcium supplementation in patients with multiple sclerosis. Clin Biochem. 2011  
590 Jul;44(10-11):930-2. Epub 2011 May 5.  
591
- 592 3. Vieth R. Critique of the considerations for establishing the tolerable upper intake level for  
593 vitamin D: critical need for revision upwards. J Nutr. 2006 Apr;136(4):1117-22.  
594
- 595 4. Heaney RP, Davies KM, Chen TC, Holick MF, Barger-Lux MJ. Human serum 25-  
596 hydroxycholecalciferol response to extended oral dosing with cholecalciferol. Am J Clin Nutr.  
597 2003 Jan;77(1):204-10. (the figure below is from this article - indicating a plateau of 25OHD on  
598 the 250 mcg [10,000 IU] dose at around 3 months of treatment)  
599

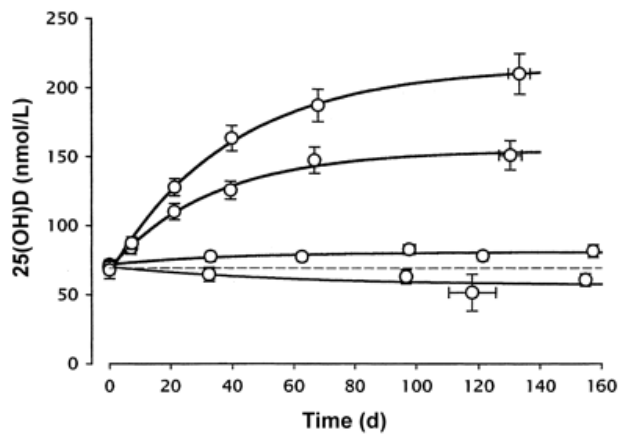

FIGURE 1.

Time course of serum 25-hydroxycholecalciferol [25(OH)D] concentration for the 4 dosage groups. The points represent the mean values, and error bars are 1 SEM. The curves are the plot of Equation 7, fitted to the mean 25(OH)D<sub>3</sub> values for each dosage group. The curves, from the lowest upward, are for 0, 25, 125, and 250 µg cholecalciferol (labeled dose)/d. The horizontal dashed line reflects zero change from baseline.

600  
601

602

603

604

605

606

## Summary of Protocol Changes

Amendment 1      Approved August 29, 2013

|   | <b>Protocol Modification</b>                                                                                                                                                                                                                                                                                                                                          |
|---|-----------------------------------------------------------------------------------------------------------------------------------------------------------------------------------------------------------------------------------------------------------------------------------------------------------------------------------------------------------------------|
| 1 | <u>Removal</u> of the Canadian Association of Radiology/Osteoporosis Canada 10-year fracture risk calculator (CAROC – available on the Osteoporosis Canada Website).<br>Only use the World Health Organization’s Canadian FRAX calculator.                                                                                                                            |
| 2 | <u>Addition</u> to exclusion criteria:<br>12. Consumption of vitamin D supplements at a dose $\geq$ 2000 IU/day for the past 6 months.<br>13. Active kidney stone disease (documented kidney stone within the last 2 years).                                                                                                                                          |
| 3 | <u>Addition</u> to osteoporosis prescription drugs as part of the exclusion criteria point 7.<br>Post-menopausal estrogen/progesterone therapy is not an exclusion if the subject’s intention is to carry on with this therapy for the proposed duration of the study, but if this therapy is stopped during the study the subject would be withdrawn from the study. |
| 4 | <u>Addition</u> to screening labs<br>Phosphate                                                                                                                                                                                                                                                                                                                        |
| 5 | <u>Addition</u> to blood sample<br>Blood for DNA will be collected at baseline                                                                                                                                                                                                                                                                                        |
| 6 | <u>Addition</u> to HR-pQCT scan<br>Added a scan at 6 months                                                                                                                                                                                                                                                                                                           |
| 7 | <u>Addition</u> of muscle strength/function<br>Tests of strength will be performed at baseline and annually (grip strength and Timed Up and Go).                                                                                                                                                                                                                      |
| 8 | <u>Addition</u> of more tests to the safety monitoring variables<br>Phosphate, hemoglobin A1C and fasting glucose obtained at baseline, 3, 6, 12, 24 and 36 months.                                                                                                                                                                                                   |

607

608

|   | <b>Protocol Modification</b>                                                                                                                                                                                                                                                                                                                                                                                                                                                                                                                                                                                                                                                                  |
|---|-----------------------------------------------------------------------------------------------------------------------------------------------------------------------------------------------------------------------------------------------------------------------------------------------------------------------------------------------------------------------------------------------------------------------------------------------------------------------------------------------------------------------------------------------------------------------------------------------------------------------------------------------------------------------------------------------|
| 1 | <p><u>Addition</u> of the pilot group and increase in the total number of participant's randomized.</p> <p>The pilot group were unable to be scanned with the second-generation HR-pQCT scanner at baseline. Participants were scanned with the first-generation HR-pQCT scanner at baseline and 6 months. At their 6-month appointment and beyond participants were scanned on the second-generation HR-pQCT scanner (6, 12, 24, 36). The only difference between the pilot and main cohort is the HR-pQCT scan at baseline.</p> <p>100 additional participants may need to be screened.</p> <p>A total of 375 participants will be recruited, of which 300 completed the full protocol.</p> |
| 2 | <p><u>Change</u> in serum 25(OH)D range for inclusion criteria.</p> <p>Serum 25(OH)D was changed to under 125 nmol/L and above 30 nmol/L.</p>                                                                                                                                                                                                                                                                                                                                                                                                                                                                                                                                                 |
| 3 | <p><u>Change</u> to the total radiation dose for study duration.</p> <p>Due to the addition of one HR-pQCT scan the maximum does will be 5µSv.</p>                                                                                                                                                                                                                                                                                                                                                                                                                                                                                                                                            |
| 4 | <p><u>Change</u> to protocol to remove analysis of P1NP</p> <p>Due to budget reasons, we were unable to attain P1NP data.</p>                                                                                                                                                                                                                                                                                                                                                                                                                                                                                                                                                                 |
| 5 | <p><u>Additional</u> data analysis of HR-pQCT scans.</p> <p>From additional post processing of our HR-pQCT scans at baseline, 6, 12, 24, 36 months we will be able to observe vascular calcification throughout the trial.</p>                                                                                                                                                                                                                                                                                                                                                                                                                                                                |
