# Supplementary material
Source: PubMed Central journal article supplement (PMC6714464)
Supplement: jama-e1911889-s002.pdf [file jama-e1911889-s002.pdf]

# Statistical Analysis Plan

## The Calgary Vitamin D Study

### Bone Density Effects of High Dose Daily Vitamin D3 for Three Years

#### Principal Investigators:

David Hanley (Endocrinologist), McCaig Institute for Bone and Joint Health

Steven Boyd (Biomedical Engineer), McCaig Institute for Bone and Joint Health

## 1 Table of Contents

|    |                                               |           |
|----|-----------------------------------------------|-----------|
| 10 | <b>Statistical Analysis Plan .....</b>        | <b>1</b>  |
| 11 | <b>2 Introduction.....</b>                    | <b>3</b>  |
| 12 | <b>2.1 Preface .....</b>                      | <b>3</b>  |
| 13 | <b>2.2 Purpose of the Analyses .....</b>      | <b>4</b>  |
| 14 | <b>3 Methods .....</b>                        | <b>4</b>  |
| 15 | <b>3.1 Funding and Ethical Approval .....</b> | <b>4</b>  |
| 16 | <b>3.2 Study Design.....</b>                  | <b>5</b>  |
| 17 | <b>3.3 Randomisation and Blinding .....</b>   | <b>5</b>  |
| 18 | <b>4 Study Outcome Variables.....</b>         | <b>6</b>  |
| 19 | <b>4.1 Primary Outcome Variables .....</b>    | <b>6</b>  |
| 20 | <b>4.2 Secondary Outcome Variables .....</b>  | <b>7</b>  |
| 21 | <b>5 Sample Size.....</b>                     | <b>8</b>  |
| 22 | <b>6 General Considerations.....</b>          | <b>12</b> |
| 23 | <b>6.1 Timing of Analyses.....</b>            | <b>12</b> |
| 24 | <b>6.2 Analysis Populations.....</b>          | <b>12</b> |
| 25 | 6.2.1 Efficacy Analysis Population.....       | 12        |
| 26 | 6.2.2 Safety Population .....                 | 12        |
| 27 | <b>6.3 Covariates and Subgroups .....</b>     | <b>12</b> |
| 28 | <b>6.4 Missing Data.....</b>                  | <b>13</b> |

29     **6.5     Interim Analyses and Data Monitoring ..... 13**

30     **6.6     Multi-centre Studies ..... 13**

31     **6.7     Multiple Testing ..... 13**

32     **7     Descriptive Analysis ..... 14**

33     **8     Efficacy Analyses..... 15**

34     **9     Safety Analyses..... 16**

35         **9.1     Population..... 16**

36         **9.2     Pre-specified Safety Outcomes ..... 16**

37         **9.3     Statistical Analysis of Safety Parameters..... 18**

38             9.3.1    Baseline Descriptive Statistics ..... 18

39             9.3.2    Graphical Analysis ..... 18

40             9.3.3    Proportion of Participants with each AE ..... 18

41             9.3.4    Incidence Rate Differences ..... 19

42     **10    Reporting Conventions..... 19**

43     **11    Software ..... 20**

44     **12    References ..... 21**

45     **13    Explanation for the Brevity of the Statistical Analysis Plan at Trial Initiation ..... 25**

46     **14    Summary of Changes to the Statistical Analysis Plan..... 26**

47

48

## 49 2 Introduction

### 50 2.1 Preface

51 Current vitamin D guidelines for older adults suggest serum 25-hydroxyvitamin D (25OHD)  
52 concentration should be at or above either 50 or 75 nmol/L [1,2]. Supplementation  
53 recommendations range from 400 to 1000 IU/day [1,2]. Higher levels of supplementation  
54 are proposed by some studies, suggesting the tolerable upper level limit of 4000 IU/day  
55 should be increased [3,4] because doses of vitamin D up to 10,000 IU/day are not  
56 considered toxic [1,5-7].

57 Randomized control trials of vitamin D supplementation have shown a positive influence on  
58 areal bone mineral density (aBMD) [8-10]; however, a recent systematic review reported  
59 very little evidence for the overall benefit of vitamin D supplementation on aBMD. This  
60 review concludes vitamin D supplements do not influence aBMD when baseline 25(OH)D  
61 levels are > 40 nmol/L, or when vitamin D is administered with calcium. There is a lack of  
62 studies with dose-response study designs [12].

63 There is considerable inconsistency in the evidence supporting the beneficial effect  
64 of vitamin D supplementation on bone health. This is exacerbated by differences in study  
65 design, dose amount, dose frequency, and the inclusion or exclusion of calcium  
66 supplementation. Furthermore, BMD outcome measures based on dual x-ray  
67 absorptiometry (DXA) is limited to density assessments and cannot assess bone  
68 microarchitecture and differences in bone compartments (cortical versus trabecular bone)  
69 that can be assessed with high resolution peripheral quantitative computed tomography  
70 (HR-pQCT).

71 Our aim is to understand the dose-dependent effect of vitamin D supplementation  
72 on bone microarchitecture in people over a three-year period, while ensuring adequate

73 calcium supplementation so that we can better determine the overall effect of vitamin D on  
74 bone health.

## 75 2.2 Purpose of the Analyses

76 The primary aims of this study are to assess, in a randomized clinical trial, whether  
77 supplementation of vitamin D<sub>3</sub> increases 1) volumetric bone mineral density as measured by  
78 HR-pQCT; 2) bone strength assessed by finite element analysis derived from HR-pQCT  
79 density and microarchitecture. Additionally, we will examine whether aBMD measured by  
80 DXA increases with vitamin D<sub>3</sub> supplementation. The secondary aims are to understand  
81 whether vitamin D<sub>3</sub> supplementation improves parameters of bone microarchitecture,  
82 balance, physical function and quality of life.

## 83 3 Methods

### 84 3.1 Funding and Ethical Approval

85 This clinical trial was designed by the lead investigators, DAH and SKB. Funding has been  
86 provided by Pure North S'Energy Foundation and funds are managed by the University of  
87 Calgary. The trial is registered with clinicaltrials.gov (NCT01900860) and has received a  
88 Health Canada Letter of No Objection to proceed. The Conjoint Health Research Ethics  
89 Board (CHREB) of the University of Calgary approved all procedures and participant consent  
90 was acquired prior to study initiation.

91

92

### 3.2 Study Design

93 This three-year randomized, double-blind clinical trial is designed to investigate the effects  
94 of daily vitamin D supplementation on bone quality, balance, physical function and quality  
95 of life. The goal was to have at least 300 people randomized in a 1:1:1 ratio to receive either  
96 400, 4000 or 10000 IU vitamin D<sub>3</sub>, cholecalciferol, taken orally once per day. We chose to  
97 test a daily dose of vitamin D, rather than (perhaps) more convenient intermittent higher  
98 dose preparations, because there is evidence that intermittent use of very high doses of  
99 vitamin D may be associated with increased risk of falls or fracture.[13,14]

100

### 3.3 Randomisation and Blinding

101 Upon meeting inclusion criteria, participants were randomized into one of the three study  
102 arms, with an equal number of men and women in each study arm. A statistician unrelated  
103 to the trial generated a randomization table, which was uploaded into the study database  
104 by the database developers. To ensure the allocation of participants into study arms was  
105 blinded to all participants and study staff, the randomization table was only visible to the  
106 database developers. The study participants and staff know the study arms as A, B and C,  
107 and do not know which group was receiving 400, 4000 or 10000 IU vitamin D<sub>3</sub>.

108

109

110

111 **4 Study Outcome Variables**

112 **4.1 Primary Outcome Variables**

113 Table 1: Primary Outcome Variables

|                         | <b>Variable</b>      | <b>Variable Name</b> | <b>Units</b>           | <b>Follow-up</b> |
|-------------------------|----------------------|----------------------|------------------------|------------------|
| Finite Element Analysis | Failure Load –Radius | Failure_load_R       | N                      | 6,12,24,36       |
|                         | Failure Load – Tibia | Failure_load_T       | N                      | 6,12,24,36       |
| HR-pQCT                 | Total BMD - Radius   | Tt_BMD_R             | mg HA/ cm <sup>3</sup> | 6,12,24,36       |
|                         | Total BMD- Tibia     | Tt_BMD_T             | mg HA/ cm <sup>3</sup> | 6,12,24,36       |

114 HR-pQCT = high resolution peripheral quantitative computed tomography, BMD = bone mineral density,  
115 TtBMD = total bone mineral density, R = radius, T = tibia

116

117

## 4.2 Secondary Outcome Variables

119 Table 2: Secondary Outcome Variables

|                         | Variable                    | Variable Name       | units                  | Follow-up             |
|-------------------------|-----------------------------|---------------------|------------------------|-----------------------|
| <b>HR-pQCT</b>          | Trabecular BMD - radius     | TbBMD_R             | mg HA/ cm <sup>3</sup> | 6,12,24,36            |
| <b>Radius and Tibia</b> | Trabecular BMD - tibia      | TbBMD_T             | mg HA/ cm <sup>3</sup> | 6,12,24,36            |
|                         | Trabecular number - radius  | TbN_R               | 1/mm                   | 6,12,24,36            |
|                         | Trabecular number - tibia   | TbN_T               | 1/mm                   | 6,12,24,36            |
|                         | Cortical BMD – radius       | CtBMD_R             | mg HA/ cm <sup>3</sup> | 6,12,24,36            |
|                         | Cortical BMD - tibia        | CtBMD_T             | mg HA/ cm <sup>3</sup> | 6,12,24,36            |
|                         | Cortical porosity – radius  | CtPo_R              | %                      | 6,12,24,36            |
|                         | Cortical porosity - tibia   | CtPo_T              | %                      | 6,12,24,36            |
| <b>DXA</b>              | Total Hip BMD               | TH_aBMD             | g/cm <sup>2</sup>      | 12,24,36              |
| <b>Protocol</b>         | Balance (mean of 3)         | Balance_mean        |                        | 12,24,36              |
| <b>Visit Sheet</b>      | Timed up and go (mean of 3) | UpandGo_mean        | Sec                    | 12,24,36              |
|                         | Grip strength (mean of 3)   | Grip_mean           | Kg                     | 12,24,36              |
|                         | Mental Health               | Sf36_mcs            |                        | 3,6,12,24,36          |
| <b>Lab</b>              | Serum 25(OH)D               | Vitamind            | nmol/L                 | 3,6,12,18,24,30,24,36 |
|                         | Plasma CTx                  | Beta_cross          | ng/L                   | 12,24,36              |
|                         | Serum Parathyroid Hormone   | Parathyroid_hormone | ng/L                   | 3,6,12,18,24,30,24,36 |

120 HR-pQCT = high resolution peripheral quantitative computed tomography, BMD = bone mineral density,  
 121 25(OH)D = 25-hydroxyvitamin D, CTx = C-telopeptide of type 1 collagen, TbBMD = trabecular bone mineral  
 122 density, TbN = trabecular number, CtBMD = cortical bone mineral density, CtPo = cortical porosity, SF-36 =  
 123 Short Form Health Survey questionnaire, R = radius, T = tibia, TH = total hip, aBMD = areal bone mineral  
 124 density

125

126

## 127 5 Sample Size

- 128 • The sample size estimation is based on two of the four primary outcomes variables,  
129 which are Tt.BMD for the tibia and radius.
- 130 • All four primary outcome variables are highly correlated, and each variable will be  
131 tested at the alpha level of 0.025, which is the traditional alpha level of 0.05  
132 corrected for multiple comparisons given that the four outcome variables are highly  
133 correlated. A Bonferroni correction for alpha would use  $\alpha/n$  but this assumes that  
134 the outcome variables are independent. Since these outcome variables are not we  
135 will use the correction  $\alpha/\sqrt{n}$ .
- 136 • The sample size is based on a one-way analysis of variance using a single p-value.
- 137 • Differences between the three groups will then be described using mean values and  
138 95% confidence intervals calculated from this analysis.
- 139 • Data from our population based prospective cohort study of post-menopausal  
140 women, showed that there was a HR-pQCT-derived TtBMD declined between 3%  
141 (tibia) and 7% (radius) over the 5 years [15].
- 142 • Assuming that this decrease was linear over this short period of time, we can assume  
143 that we can expect at decrease of approximately 1.8% decrease over three years for  
144 the TtBMD Tibia and 4.2% for the Radius.
- 145 • These are somewhat larger than values from published data for placebo groups from  
146 a previous RCT exploring vitamin D supplementation on BMD in the hip and total  
147 body using DXA [16].
- 148 • In an RCT examining treatment with osteoporotic medication or placebo in  
149 postmenopausal women with low bone density, in which morphologic changes were



150 assessed using HR-pQCT at the distal radius and distal tibia, women taking the  
151 placebo (representing normal bone aging) had an annual total bone loss of up to 2%  
152 at the radius and 0.5% in the tibia [17].

- 153 • Thus, for our sample size calculations we have allowed for a decrease in the total  
154 volumetric BMD (TtBMD, tibia and radius) in the 400 IU dose group to range from 2%  
155 to 6% over the three years of the study.
- 156 • In keeping with the primary aim of this study the sample size will be based on the  
157 ability of this study to detect a clinically relevant dose-dependent effect of vitamin D  
158 supplementation, should this exist. For the 4,000 IU group this is considered as  
159 improving the rate of decrease by 50% or more (1% to 3%) and for the 10,000 IU  
160 group this is considered to be arresting the rate of decline or even improving the  
161 values.
- 162 • Using a sub-section of our large population-based cohort [18] aged 55-70 years, the  
163 mean TtBMD at the tibia was 283 (SD 57) mg HA/cm<sup>3</sup>. We will be testing the mean  
164 difference between the three-year value and the baseline value in each of the three  
165 groups.
- 166 • In order to estimate the standard deviation for the change score, we assumed from  
167 previous data the measurements taken one year apart would be highly correlated,  
168 so we calculated the SD of the change score using a correlation of 0.95 to estimate  
169 the covariance, which is quite conservative.
- 170 • We allowed the power to vary from 80% to 95% and the number of participants  
171 needed in each group for each scenario are presented in Table 3 below.

172

173 Table 3: Estimated Number of participants needed in each group to observed hypothesized  
 174 differences at an alpha level of 0.025 with the given power

| Treatment<br>Group | Baseline<br>Tt.BMD |    | Loss   |      | Tt.BMD | Change |    | Number of Participants<br>needed in each group for<br>the given power |     |     |     |
|--------------------|--------------------|----|--------|------|--------|--------|----|-----------------------------------------------------------------------|-----|-----|-----|
|                    | Mean               | SD | Annual | 3 yr | 3 yrs  | 3 yr   | SD | 80%                                                                   | 85% | 90% | 95% |
| 400 IU             | 283                | 57 | 2%     | 6%   | 266.0  | 17.0   | 17 | 25                                                                    | 28  | 31  | 37  |
| 4,000 IU           | 283                | 57 | 1%     | 3%   | 274.5  | 8.5    | 17 | 25                                                                    | 28  | 31  | 37  |
| 10,000 IU          | 283                | 57 | 0      | 0    | 283.0  | 0.0    | 17 | 25                                                                    | 28  | 31  | 37  |
|                    |                    |    |        |      |        |        |    |                                                                       |     |     |     |
| 400 IU             | 283                | 57 | 1.70%  | 5%   | 268.8  | 14.2   | 17 | 35                                                                    | 39  | 44  | 53  |
| 4,000 IU           | 283                | 57 | 0.83%  | 2.5% | 275.9  | 7.1    | 17 | 35                                                                    | 39  | 44  | 53  |
| 10,000 IU          | 283                | 57 | 0      | 0    | 283.0  | 0.0    | 17 | 35                                                                    | 39  | 44  | 53  |
|                    |                    |    |        |      |        |        |    |                                                                       |     |     |     |
| 400 IU             | 283                | 57 | 1.3%   | 4%   | 271.7  | 11.3   | 17 | 54                                                                    | 60  | 69  | 82  |
| 4,000 IU           | 283                | 57 | 0.7%   | 2%   | 277.3  | 5.7    | 17 | 54                                                                    | 60  | 69  | 82  |
| 10,000 IU          | 283                | 57 | 0      | 0    | 283.0  | 0.0    | 17 | 54                                                                    | 60  | 69  | 82  |
|                    |                    |    |        |      |        |        |    |                                                                       |     |     |     |
| 400 IU             | 283                | 57 | 1.2%   | 3.3% | 274.5  | 10.2   | 17 | 66                                                                    | 73  | 84  | 100 |
| 4,000 IU           | 283                | 57 | 0.6%   | 1.8% | 278.7  | 5.1    | 17 | 66                                                                    | 73  | 84  | 100 |
| 10,000 IU          | 283                | 57 | 0      | 0    | 283.0  | 0.0    | 17 | 66                                                                    | 73  | 84  | 100 |
|                    |                    |    |        |      |        |        |    |                                                                       |     |     |     |
| 400 IU             | 283                | 57 | 1.1%   | 3.3% | 274.5  | 9.3    | 17 | 79                                                                    | 88  | 100 | 120 |
| 4,000 IU           | 283                | 57 | 0.6%   | 1.8% | 278.7  | 4.7    | 17 | 79                                                                    | 88  | 100 | 120 |
| 10,000 IU          | 283                | 57 | 0      | 0    | 283.0  | 0.0    | 17 | 79                                                                    | 88  | 100 | 120 |
|                    |                    |    |        |      |        |        |    |                                                                       |     |     |     |
| 400 IU             | 283                | 57 | 1.0%   | 3%   | 274.5  | 8.5    | 17 | 94                                                                    | 105 | 120 | 144 |
| 4,000 IU           | 283                | 57 | 0.5%   | 1.5% | 278.7  | 4.2    | 17 | 94                                                                    | 105 | 120 | 144 |
| 10,000 IU          | 283                | 57 | 0      | 0    | 283.0  | 0.0    | 17 | 94                                                                    | 105 | 120 | 144 |
|                    |                    |    |        |      |        |        |    |                                                                       |     |     |     |
| 400 IU             | 283                | 57 | 0.7%   | 2%   | 277.3  | 5.7    | 17 | 206                                                                   | 231 | 264 | 317 |
| 4000 IU            | 283                | 57 | 0.3%   | 1%   | 280.1  | 2.8    | 17 | 206                                                                   | 231 | 264 | 317 |
| 10,000 IU          | 283                | 57 | 0      | 0    | 283.0  | 0.0    | 17 | 206                                                                   | 231 | 264 | 317 |

175

176

- 177
- Sample size calculations, based on these assumptions showed that for an annual loss  
178 of more than 1.0% in the 400 IU group, there will be sufficient power to detect the  
179 hypothesized differences should these exist. For example, when the annual loss in  
180 the 400 IU group is 1.1% then 79 participants in each group (237 in total) will be  
181 required to achieve 80% power at the alpha level of 0.025, whereas if the annual loss  
182 in this group is 1.0% then 94 participants in each group (282 in total) would be  
183 required.
  - Therefore, we plan on recruiting 84 patients per group (total 252), which would give  
184 90% power at an alpha level of 0.025 if the annual loss in the 400 IU group is 1.2%,  
185 and allowing for 20% attrition this will require recruiting 100 participants in each  
186 group for a total of 300.
  - In our laboratory, we have established the reproducibility of HR-pQCT parameters,  
188 reporting total bone density (TtBMD) reproducibility of 0.6% [19]. This is in part due  
189 to the 3D image registration techniques that have been developed to maximize our  
190 ability to detect change [19]. By implementing 3D image registration, we expect the  
191 three-year changes observed in this study to be larger than scanner precision and  
192 highly reproducible, allowing us to detect changes as small as 1% in TtBMD.  
193

194

195

## 196 6 General Considerations

### 197 6.1 Timing of Analyses

- 198 • The final analysis will be performed after the final patient enrolled has completed  
199 follow-up, the database is completed, cleaned and locked.

### 200 6.2 Analysis Populations

#### 201 6.2.1 Efficacy Analysis Population

- 202 • Modified Intent to Treat: All subjects who received any study drug and who  
203 participated in at least one post-baseline assessment.

#### 204 6.2.2 Safety Population

- 205 • All subjects who were randomised and therefore received any study drug.

### 206 6.3 Covariates and Subgroups

- 207 • No subgroup analysis will be done for the primary efficacy analysis.
- 208 • No other covariates will be included in the primary efficacy analysis.
- 209 • Future analysis will examine factors such as the effect of treatment for varying  
210 baseline level of serum vitamin D. These analyses will be exploratory, since the  
211 sample size was not powered to detect any additional interactions.
- 212 • Other exploratory analyses will be planned after the conclusion of the primary  
213 efficacy and safety analyses are completed.

214

## 215 6.4 Missing Data

- 216 • From pilot study data, it is not anticipated that there will be many missing data  
217 points in the primary and secondary outcome variables.
- 218 • In descriptive statistics missing data will be quantified per variable (%).
- 219 • Potential patterns of missing data will be examined.
- 220 • Missing data will be taken into account using the linear random effects models which  
221 is considered better than using the Last Observation Carried Forward (LOCF)  
222 approach [20].

## 223 6.5 Interim Analyses and Data Monitoring

- 224 • There will be no interim analysis.

## 225 6.6 Multi-centre Studies

- 226 • This is a single centre trial.

## 227 6.7 Multiple Testing

- 228 • The four primary outcome variables likely to be (highly) correlated, Bonferroni  
229 correction ( $\alpha/k$ ) where  $k$  is the number of tests applies to independent tests. Tukey  
230 suggested using  $\alpha/\sqrt{k}$  when outcome variables are correlated but the correlation is  
231 unknown. Therefore, we could treat all four primary outcomes as equally important  
232 and test them at  $\alpha = 0.025$ .
- 233 • Rather than solely relying on p-values for the interpretation of the results. The  
234 results will be presented using predicted means with 95% CI of the fixed effects  
235 (time point and treatment) from each random effects regression model.
- 236 • All the secondary outcomes will be tested with  $\alpha = 0.05$ . However, keeping in mind  
237 the large number of secondary outcomes examined, the large probability of

238 spuriously significant results at the 5% level of significance (and even the 1% level of  
239 significance) will be kept in mind.

## 240 7 Descriptive Analysis

- 241 • Initial statistical analyses will describe baseline demographic, medical, and lifestyle  
242 characteristics of the study participants by randomized group at baseline using the  
243 mean and standard deviation for approximately normally distributed variables and n  
244 (%) for categorical variables. The intent to treat population will be used.
- 245 • The four primary outcome variables will be described using the mean, standard  
246 deviate and % missing values by treatment group (intent to treat) at each time point  
247 (baseline, 6 months, 12months, 24 months and 36 months).
- 248 • The secondary outcome variables will be described using the mean, standard deviate  
249 and % missing values by treatment group at each point in time (baseline, 6 months,  
250 12months, 24 months and 36 months).
- 251 • The Lab Safety value variables will be described using the mean, standard deviate  
252 and % missing values by treatment group at each point in time (baseline, (3 months)  
253 6 months, 12months, (18 months) 24 months (30 months) and 36 months). 25-  
254 hydroxyvitamin D, PTH = Parathyroid hormone and CTx = C-telopeptide of type 1  
255 collagen. Laboratory normal range is: 25(OH)D: 80 – 200 nmol/L; PTH: 7 – 37 ng/L;  
256 CTX: 0 – 400 ng/L.

257

## 258 8 Efficacy Analyses

- 259 • A constrained linear mixed effects model [21] will be used to analyse each outcome  
260 (both primary and secondary) variable. Baseline values will be constrained to be the  
261 same in each of the three treatment groups, since these were measured prior to  
262 randomization. The dependent variable will include all measurements taken post  
263 baseline.
- 264 • Visual inspection of individual profile plots will be done to assess the potential of a  
265 non-linear effect and if evident will be included in the model as a quadratic  
266 treatment effect.
- 267 • Fixed effects will include, time, treatment group and a potential treatment by time  
268 interaction (which if significant will be indicative of efficacy).
- 269 • Potential Random effects will include both intercept and slope. The correlation  
270 within subjects will be modelled as an autoregressive error of order 1.
- 271 • Diagnostic residual plots will be examined for deviation from the assumptions  
272 underlying the model and if necessary an appropriate transformation (such as a  
273 logarithm) of any deviant outcome variable will be applied. If such a transformation  
274 is necessary, the results will be presented in the original units.
- 275 • We will start with the full model. Unnecessary quadratic terms will be removed as  
276 will unnecessary random slopes or intercept terms to arrive at a parsimonious well-  
277 fitting model for each outcome variable.
- 278 • Non-significant treatment by time interactions will be retained in the model and  
279 reported to describe the lack of observed treatment effect.

280

- 281 • Missing values will be accounted for by using the linear mixed effects model which is  
282 considered a superior method to the of using LOCF [20]
- 283 • The results of the regression modelling will be described in table format where the  
284 Likelihood Ratio Statistic (LRS) for the quadratic term on 1 df (before removal in  
285 cases where this term was unnecessary) and the LRS on 2 df for the treatment group  
286 by time interaction, which yield the p-value for the treatment effect.
- 287 • Since coefficients for both quadratic terms and interaction terms are hard to  
288 interpret, results of the regression models will also be presented as the mean (with  
289 95% CI) fixed effects calculated from the coefficients.

## 290 9 Safety Analyses

### 291 9.1 Population

- 292 • All randomized patients who receive at least one dose of the study drug.

### 293 9.2 Pre-specified Safety Outcomes

- 294 • The pre-specified safety outcomes are divided into three groups: Biochemical  
295 parameters, occurrence of AEs (deaths, serious AEs) and AE of special interest  
296 (nephrolithiasis, cancer, falls and fractures). The incidence of infections and upper  
297 respiratory tract infections were exploratory outcomes.
- 298
- 299



300 Table 4: Pre-specified Safety Outcomes

|                                                 |                                                                                            |
|-------------------------------------------------|--------------------------------------------------------------------------------------------|
| <b>Biochemical Parameters</b>                   |                                                                                            |
|                                                 | Hypercalcemia                                                                              |
|                                                 | Hypercalciuria                                                                             |
|                                                 | Creatinine >133 umol/L                                                                     |
|                                                 | estimated Glomerular Filtration Rate (eGFR) decline of >10 mL/min                          |
|                                                 | Aspartate aminotransferase (AST) or Alanine aminotransferase (ALT) > 1.5x ULN <sup>a</sup> |
| <b>Clinical Adverse Events (AE)<sup>b</sup></b> |                                                                                            |
| <b>All Clinical AEs</b>                         | Neurologic                                                                                 |
| <b>Serious AEs</b>                              | Ophthalmologic                                                                             |
|                                                 | Otolaryngologic                                                                            |
|                                                 | Cardiovascular                                                                             |
|                                                 | Pulmonary                                                                                  |
|                                                 | Gastrointestinal                                                                           |
|                                                 | Genitourinary                                                                              |
|                                                 | Endocrine                                                                                  |
|                                                 | Hematologic                                                                                |
|                                                 | Dermatologic                                                                               |
|                                                 | Musculoskeletal                                                                            |
|                                                 | Psychiatric                                                                                |
|                                                 | Other <sup>c</sup>                                                                         |
| <b>AEs of Special Interest</b>                  |                                                                                            |
|                                                 | Falls                                                                                      |
|                                                 | Low-trauma fractures                                                                       |
|                                                 | Nephrolithiasis                                                                            |
|                                                 | Non-skin cancer <sup>d</sup>                                                               |
|                                                 | Skin cancer                                                                                |
|                                                 | Infections                                                                                 |
|                                                 | Upper respiratory tract infections                                                         |

ULN = upper limit of normal,

<sup>a</sup> AST ULN = 32 IU/L for females and 40 IU/L for males, ALT ULN = 40 IU/L for females and 60 IU/L for males,

<sup>b</sup> AEs and serious AEs defined using the standard International Conference on Harmonization Good Clinical Practice definition

<sup>c</sup> AEs that do not localize to a single organ system (e.g. diffuse infectious symptoms, generalized allergic reactions, electrolyte abnormalities, fatigue, insomnia, weight changes)

<sup>d</sup> includes melanoma

302

## 9.3 Statistical Analysis of Safety Parameters

303

### **9.3.1 Baseline Descriptive Statistics**

304

- Initial statistical analyses will describe baseline demographic, medical, and lifestyle characteristics of the study participants by randomized group at baseline using the mean and standard deviation for approximately normally distributed variables and n (%) for categorical variables.

305

306

307

308

### **9.3.2 Graphical Analysis**

- The distributions of the continuous variables will be illustrated using boxplots. Box plots of three-year changes in serum 25-hydroxyvitamin D, serum calcium, serum creatinine, and 24-hour urine calcium in healthy adults taking vitamin D 400IU, 4000 IU, or 10000 IU/day. Boxes show medians and interquartile ranges. The whiskers show the adjacent values, which indicate where approximately 99% of the values of the data lie. Horizontal dashed lines represent the upper limit of the normal range for serum calcium, 133  $\mu\text{mol/L}$  for serum creatinine, and 24-hour urine calcium excretion of 7.5 mmol/day.

309

### **9.3.3 Proportion of Participants with each AE**

- For each AE, the total number of occurrences in each treatment arm will be tabulated. The proportion of participants in each treatment group who experienced each AE will be determined and examined formally (for pre-specified safety outcomes, provided the overall prevalence of the AE greater than or equal to 4% and less than or equal to 96%) for between treatment group differences for trend in proportions using logistic regression.

310

311

### 9.3.4 Incidence Rate Differences

312

- The proportion of healthy individuals experiencing relevant biochemical and clinical adverse events (AEs) while taking vitamin D 400, 4000, or 10000 IU/day for three years, using 400 IU/day as the referent. Incidence rates reflect the number of participants experiencing the event per person-year of follow-up. Error bars will represent 95% confidence intervals. *When calculating the incidence of adverse events each subject will only be counted once and any repetitions will be ignored; the denominator will be the total population size.*

313

314

315

316

317

318

319

- P-values  $<0.05$  will be considered statistically significant and were not adjusted.

320

## 10 Reporting Conventions

321

- P-values  $\geq 0.001$  will be reported to 3 decimal places; p-values less than 0.001 will be reported as “ $<0.001$ ”.

322

323

- The mean, standard deviation, and any other statistics other than quantiles, will be reported to one decimal place greater than the original data. Quantiles, such as median, or minimum and maximum will use the same number of decimal places as the original data. Estimated parameters, not on the same scale as raw observations (e.g. regression coefficients) will be reported to 3 significant figures.

324

325

326

327

328

329 **1 | Software**

- 330 • Statistical analyses will be conducted using the R project for Statistical Computing (R  
331 Studio, version 1.0.143 ). R Markdown will be used to produce reproducible  
332 statistics documentation including tables and graphs.

333

## 334 12 References

- 335 [1] IOM 2011 Dietary reference intakes for calcium and vitamin D, The National  
336 Academies Press, Washington, DC.
- 337 [2] M.F. Holick, N.C. Binkley, H.A. Bischoff-Ferrari, C.M. Gordon, D.A. Hanley, R.P.  
338 Heaney, et al., Evaluation, treatment, and prevention of vitamin D deficiency: an  
339 Endocrine Society clinical practice guideline, *J. Clin. Endocrinol. Metab.* 96 (2011)  
340 1911–1930. doi:10.1210/jc.2011-0385.
- 341 [3] R.P. Heaney, K.M. Davies, T.C. Chen, M.F. Holick, M.J. Barger-Lux, Serum 25 hydroxy  
342 cholecalciferol response to oral dosing with cholecalciferol vitamin D doses  
343 response relationships, *77* (2003) 204–210.
- 344 [4] R. Vieth, P.C. Chan, G.D. MacFarlane, Efficacy and safety of vitamin D3 intake  
345 exceeding the lowest observed adverse effect level, *Am J Clin Nutr.* 73 (2001) 288–  
346 294. doi:10.3945/ajcn.116.136697.
- 347 [5] J.N. Hathcock, A. Shao, R. Vieth, R. Heaney, Risk assessment for vitamin D, *Am J Clin*  
348 *Nutr.* 85 (2007) 6–18. doi:10.1097/01.mog.0000196150.36701.c2.
- 349 [6] R. Rizzoli, S. Boonen, M.L. Brandi, O. Bruyère, C. Cooper, J.A. Kanis, et al., Vitamin D  
350 supplementation in elderly or postmenopausal women: a 2013 update of the 2008  
351 recommendations from the European Society for Clinical and Economic Aspects of  
352 Osteoporosis and Osteoarthritis (ESCEO), in: *Curr Med Res Opin*, 2013: pp. 305–313.  
353 doi:10.1185/03007995.2013.766162.
- 354 [7] A.C. Ross, J.E. Manson, S.A. Abrams, J.F. Aloia, P.M. Brannon, S.K. Clinton, et al., The  
355 2011 Report on Dietary Reference Intakes for Calcium and Vitamin D from the  
356 Institute of Medicine: What Clinicians Need to Know, *J. Clin. Endocrinol. Metab.* 96  
357 (2011) 53–58. doi:10.1210/jc.2010-2704.

- 358 [8] M.E. Ooms, J.C. Roos, P.D. Bezemer, W.J. van der Vijgh, L.M. Bouter, P. Lips,  
359 Prevention of bone loss by vitamin D supplementation in elderly women: a  
360 randomized double-blind trial, *J. Clin. Endocrinol. Metab.* 80 (1995) 1052–1058.  
361 doi:10.1210/jcem.80.4.7714065.
- 362 [9] I.R. Reid, A.M. Horne, B. Mihov, G.D. Gamble, F. Al Abuwsi, M. Singh, et al., Effect of  
363 monthly high-dose vitamin D on bone density in community-dwelling older adults  
364 substudy of a randomized controlled trial, *Journal of Internal Medicine.* 383 (2017)  
365 146. doi:10.1111/joim.12651.
- 366 [10] H.M. Macdonald, A.D. Wood, L.S. Aucott, A.J. Black, W.D. Fraser, A. Mavroeydi, et  
367 al., Hip bone loss is attenuated with 1000 IU but not 400 IU daily vitamin D3: A 1-  
368 year double-blind RCT in postmenopausal women, *J. Bone Miner. Res.* 28 (2013)  
369 2202–2213. doi:10.1002/jbmr.1959.
- 370 [11] I.R. Reid, M.J. Bolland, A. Grey, Effects of vitamin D supplements on bone mineral  
371 density: a systematic review and meta-analysis, *Lancet.* 383 (2014) 146–155.  
372 doi:10.1016/S0140-6736(13)61647-5.
- 373 [12] L.M. Smith, J.C. Gallagher, Dietary vitamin D intake for the elderly population:  
374 update on the recommended dietary allowance for vitamin D, *Endocrinol. Metab.*  
375 *Clin. North Am.* 46 (2017) 871–884, <http://dx.doi.org/10.1016/j.ecl.2017.07.003>.
- 376 [13] K.M. Sanders, A.L. Stuart, E.J. Williamson, J.A. Simpson, M.A. Kotowicz, D. Young, et  
377 al., Annual high-dose oral vitamin D and falls and fractures in older women: a  
378 randomized controlled trial, *JAMA.* 303 (2010) 1815–1822.  
379 doi:10.1001/jama.2010.594.
- 380 [14] H. Smith, F. Anderson, H. Raphael, P. Maslin, S. Crozier, C. Cooper, Effect of annual  
381 intramuscular vitamin D on fracture risk in elderly men and women--a population-

- 382 based, randomized, double-blind, placebo-controlled trial, *Rheumatology (Oxford)*.  
383 46 (2007) 1852–1857. doi:10.1093/rheumatology/kem240.
- 384 [15] L.A. Burt, A.L. Menard, H.M. Macdonald, D.A. Hanley, S.K. Boyd, A five-year  
385 longitudinal study of site-specific changes in bone quality in the calgary population  
386 based cohort: an HR-pQCT study, *J. Bone Miner. Res.*, 28 (Suppl. 1). Available at:  
387 [http://www.asbmr.org/asbmr-2013-abstract-detail?aid=bf061225-0796-4f92-99c9-](http://www.asbmr.org/asbmr-2013-abstract-detail?aid=bf061225-0796-4f92-99c9-51edbbbfc58f)  
388 [51edbbbfc58f](http://www.asbmr.org/asbmr-2013-abstract-detail?aid=bf061225-0796-4f92-99c9-51edbbbfc58f).
- 389 [16] Dawson-Hughes, S.S. Harris, E.A. Krall, G.E. Dallal, Effect of calcium and vitamin D  
390 supplementation on bone density in men and women 65 years of age or older,  
391 *N.Engl. J. Med.* 337 (1997) 670–676,  
392 <http://dx.doi.org/10.1056/NEJM199709043371003>.
- 393 [17] E. Seeman, P.D. Delmas, D.A. Hanley, D. Sellmeyer, A.M. Cheung, E. Shane, et al.,  
394 Microarchitectural deterioration of cortical and trabecular bone: differing effects of  
395 denosumab and alendronate, *J. Bone Miner. Res.* 25 (2010) 1886–1894.  
396 doi:10.1002/jbmr.81.
- 397 [18] H.M. Macdonald, K.K. Nishiyama, J. Kang, D.A. Hanley, S.K. Boyd, Age-related  
398 patterns of trabecular and cortical bone loss differ between sexes and skeletal  
399 sites: a population-based HR-pQCT study, *J. Bone Miner. Res.* 26 (2011) 50–62,  
400 <http://dx.doi.org/10.1002/jbmr.171>.
- 401 [19] J.A. MacNeil, S.K. Boyd, Improved reproducibility of high-resolution peripheral  
402 quantitative computed tomography for measurement of bone quality, *Med Eng*  
403 *Phys.* 30 (2008) 792–799. doi:10.1016/j.medengphy.2007.11.003.1

404 [20] Molenberghs G, Thijs H, Jansen I, Beunckens, C. Analyzing incomplete longitudinal  
405 clinical trial data. *Biostatistics* (2004), 5, 3, pp. 445–464 doi:  
406 10.1093/biostatistics/kxh001

407 [21] Coffman CJ, Edelman D, Woolson RF. To condition or not condition? Analysing  
408 ‘change’ in longitudinal randomized controlled trials. *BMJ Open* 2016;6:e013096.  
409 doi:10.1136/bmjopen-2016-013096

410

411

412



### 413 1 3 Explanation for the Brevity of the Statistical Analysis Plan at Trial 414 Initiation

415

416 We started the trial with a very simple analysis plan, focused on our main goal of  
417 determining whether there were different effects of the three levels of Vitamin D dose on  
418 bone parameters, as measured by HR-pQCT. We recognized from the outset that the trial  
419 was going to generate a very large database, and that we would need expert help in  
420 finalizing an appropriate statistical analysis plan. We therefore advertised to secure a  
421 statistician as a vital team member. Unfortunately, we were not able to find such an  
422 individual at the time of trial initiation, and it was not until we were into the last half of the  
423 trial before we were able to recruit Dr. M.S. Rose to our investigator team as our statistics  
424 expert; she then helped us design what we feel is an appropriate way to analyze our data.

425

426 Following advice from our statistician co-investigator, we have limited the number of  
427 primary outcomes obtained from HR-pQCT measurements to total volumetric bone density  
428 (Tt.BMD) at the radius and tibia, and calculated failure load (Finite Element Analysis) at  
429 those sites.

430

## 431 14 Summary of Changes to the Statistical Analysis Plan

432

433 The statistician (M.S. Rose) who wrote this Statistical Analysis Plan joined the Team after the

434 original protocol was approved. No changes were made to the Statistical Analysis Plan

435 following the addition of the statistician (M.S. Rose) and our plan was finalized prior to

436 study completion and unblinding of the data.

437
