# Supplementary material
Source: PubMed Central journal article supplement (PMC6714464)
Supplement: jama-e1911889-s004.pdf [file jama-e1911889-s004.pdf]

## Data Sharing Statement

### Data

**Data available:** Yes

**Data types:** Deidentified participant data

**How to access data:** To gain access email [skboyd@ucalgary.ca](mailto:skboyd@ucalgary.ca).  
Data requestors will need to sign a data access agreement.

**When available:** beginning date: 01-01-2020, end date: 12-31-2025

### Supporting Documents

**Document types:** None

### Additional Information

**Who can access the data:** The authors commit to making relevant anonymized patient-level data available to researchers who provide a methodologically sound proposal.

**Types of analyses:** Data will be made available for a variety of purposes.

**Mechanisms of data availability:** Data will be made available following a methodologically sound proposal and a signed data access agreement.
